# Supplementary material
Source: PubMed Central journal article supplement (PMC4431958)
Supplement: NIHMS635862-supplement-supplement_1.pdf [file NIHMS635862-supplement-supplement_1.pdf]

1 **Supplemental Data**

2 **Perfluorooctanoic acid (PFOA)-induced liver lesions in two strains of mice following developmental**  
 3 **exposures: PPAR $\alpha$  is not required.**

4 Adam J. Filgo<sup>1,2</sup>, Erin M. Quist<sup>2,5</sup>, Mark J. Hoenerhoff<sup>3</sup>, Amy E. Brix<sup>6</sup>, Grace E. Kissling<sup>4</sup>, and Suzanne  
 5 E. Fenton<sup>2</sup>

6  
 7 <sup>1</sup>Curriculum in Toxicology, University of North Carolina, School of Medicine, Chapel Hill, NC, USA

8 <sup>2</sup>National Toxicology Program Laboratory and <sup>3</sup>Cellular and Molecular Pathology Branch, Division of the  
 9 National Toxicology Program; <sup>4</sup>Biostatistics Branch, Division of Intramural Research;  
 10 National Institute of Environmental Health Sciences, National Institute of Health, RTP, NC, USA

11 <sup>5</sup>Comparative Biomedical Sciences, College of Veterinary Medicine, North Carolina State University,  
 12 Raleigh, NC, USA

13 <sup>6</sup>Experimental Pathology Laboratories, Inc., RTP, NC, USA

14  
 15 Supplemental Data Table 1. Percentage (%) of mice euthanized prior to 18 months (end of study) in  
 16 the three strains utilized in these studies.

| Mouse Strain            | PFOA Dose (mg PFOA/kg body weight/day) |      |      |      |      |      |      |      |
|-------------------------|----------------------------------------|------|------|------|------|------|------|------|
|                         | 0                                      | 0.01 | 0.1  | 0.3  | 0.6  | 1.0  | 3.0  | 5.0  |
| CD-1*                   | 27.5                                   | 17.1 | 15.9 | 27.7 | n/a  | 24.4 | n/a  | 22.2 |
| 129/Sv WT               | 16.7                                   | n/a  | 16.7 | 11.1 | 14.3 | 11.1 | n/a  | n/a  |
| 129/Sv PPAR $\alpha$ KO | 25.0                                   | n/a  | 23.1 | 16.7 | n/a  | 0    | 18.2 | n/a  |

17 n/a = not applicable; this dose was not used in the strain listed.

18 \* Average for CD-1 in 8 separate studies ending at 18 months was 21.7% (Giknis and Clifford, 2010).

19
